# Supplementary material for: B12-induced reassembly of split photoreceptor protein enables photoresponsive hydrogels with tunable mechanics
Source: PubMed Central journal article supplement — Sci Adv. 2022 Apr 1;8(13):eabm5482. doi: 10.1126/sciadv.abm5482 (PMC10938628; doi:10.1126/sciadv.abm5482), 2022-04-01
Supplement: sciadv.abm5482_sm.pdf [file sciadv.abm5482_sm.pdf]

Supplementary Materials for

**B<sub>12</sub>-induced reassembly of split photoreceptor protein enables  
photoresponsive hydrogels with tunable mechanics**

Zhongguang Yang, Hong Kiu Francis Fok, Jiren Luo, Yang Yang, Ri Wang,  
Xinyu Huang, Fei Sun\*

\*Corresponding author. Email: kefsun@ust.hk

Published 1 April 2022, *Sci. Adv.* **8**, eabm5482 (2022)  
DOI: 10.1126/sciadv.abm5482

**This PDF file includes:**

Figs. S1 to S31  
Table S1  
Appendix

PEDLGTGLLEALLRGDLAGAEALFRRGLRFWGPEGVLEHL  
LLPVLREVGAEAWHRGEIGVAEEHLASTFLRARLQELDLA  
GFPPGPPVLVTTTPGERHEIGAMLAAYHLRRKGVPAALYLG  
PDTPLPDLRALARRLGAGAVVLSAVLSEPLRALPDGALKD  
LAPRVFLGGQGAGPEEARRLGAEYMEDLKGLAEALWLPR  
GPEKEAI

**Fig. S1. Amino acid sequence of CarH<sub>C</sub>.** The N-terminal four-helix bundle, the loop region and the C-terminal B<sub>12</sub>-binding domain are highlighted in yellow, red, and green, respectively.

CarH<sub>C</sub>N (10.1 kDa)

GPGSEFPEDLGTGLLEALLRGDLAGAEALFRRGLRFWGPEGV  
LEHLLLPVLREVGEAWHRGEIGVAEEHLASTFLRARLQELDLA  
GFPPGPP

CarH<sub>C</sub>C (13.6 kDa)

GPGSEFPPGPPVLVTPPGERHEIGAMLAAYHLRRKGVPA  
LYL  
GPDTPDLRALARRLGAGAVLSAVLSEPLRALPDGALKDLA  
PRVFLGGQGAGPEEARRLGAEYMEDLKGLAEALWLPRGPEK  
EAI

**Fig. S2. Amino acid sequences of CarH<sub>C</sub>N and CarH<sub>C</sub>C.** The N-terminal His6-tag was removed by 3C protease before use in this study.

**A**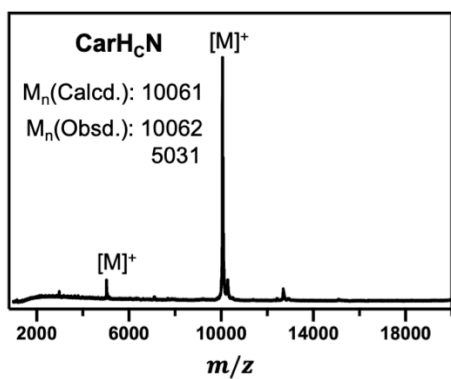**B**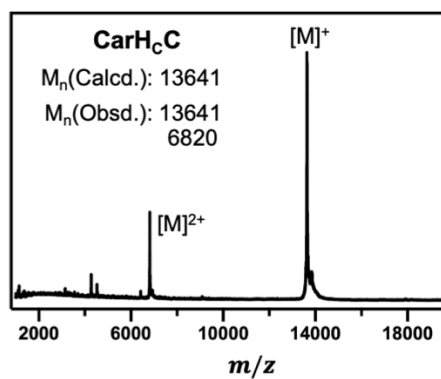**C**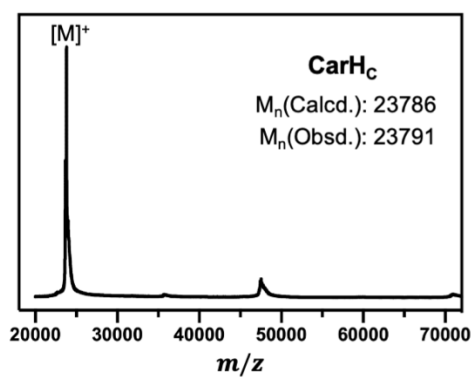

**Fig. S3. MALDI-TOF mass spectra of (A) CarH<sub>c</sub>N, (B) CarH<sub>c</sub>C and (C) CarH<sub>c</sub>.**



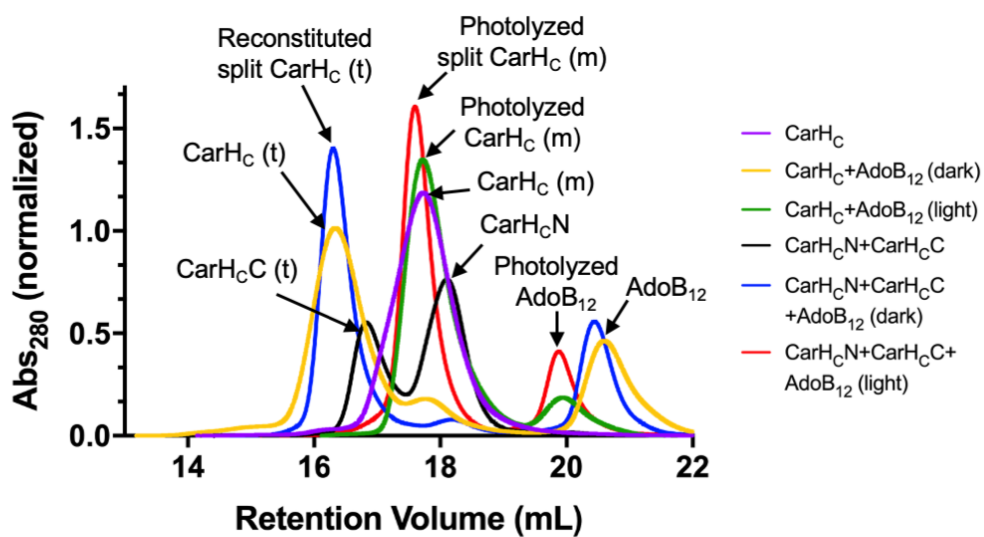

**Fig. S4. SEC analyses of CarH<sub>C</sub> and split CarH<sub>C</sub> with addition of AdoB<sub>12</sub>.** “m” and “t” denote “monomer” and “tetramer”, respectively.

**A**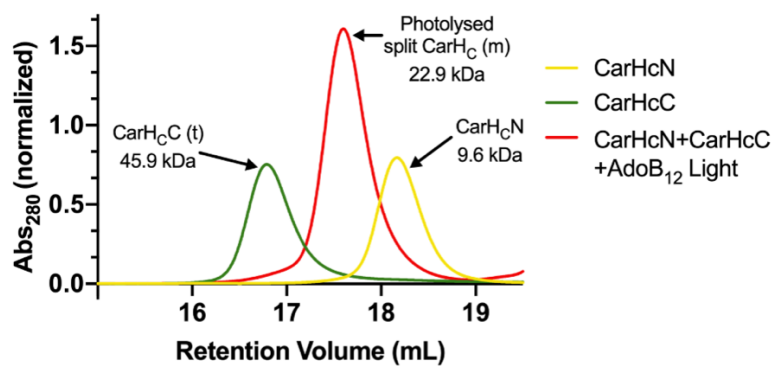**B**

| Protein                               | Calculated MW                             | Measured MW    |
|---------------------------------------|-------------------------------------------|----------------|
| CarH <sub>c</sub> N                   | 10.1 kDa                                  | 9.6 ± 0.6 kDa  |
| CarH <sub>c</sub> C                   | 13.6 kDa (monomer)<br>54.4 kDa (tetramer) | 45.9 ± 0.6 kDa |
| Reconstituted split CarH <sub>c</sub> | 25.0 kDa                                  | 22.9 ± 0.3 kDa |

**Fig. S5. Size exclusion chromatography (SEC) (A) and dynamic light scattering (DLS) analyses (B) of CarH<sub>c</sub>N, CarH<sub>c</sub>C, and CarH<sub>c</sub>N + CarH<sub>c</sub>C + AdoB<sub>12</sub> (light). “m” and “t” denote “monomer” and “tetramer”, respectively.**

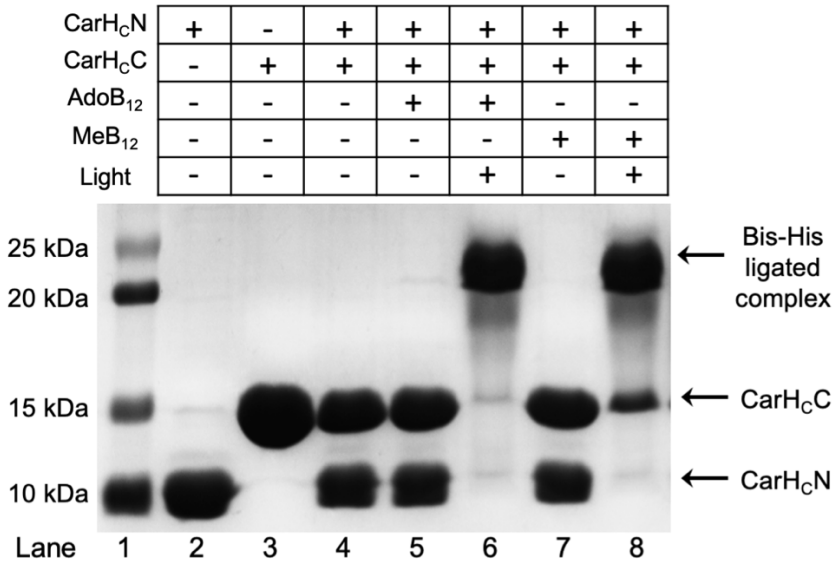

**Fig. S6. SDS-PAGE analysis of the split-CarH<sub>C</sub> reconstitution induced by AdoB<sub>12</sub> and MeB<sub>12</sub>.** Protein samples were denatured using the 4% SDS loading dye (2X) at room temperature before the electrophoresis.

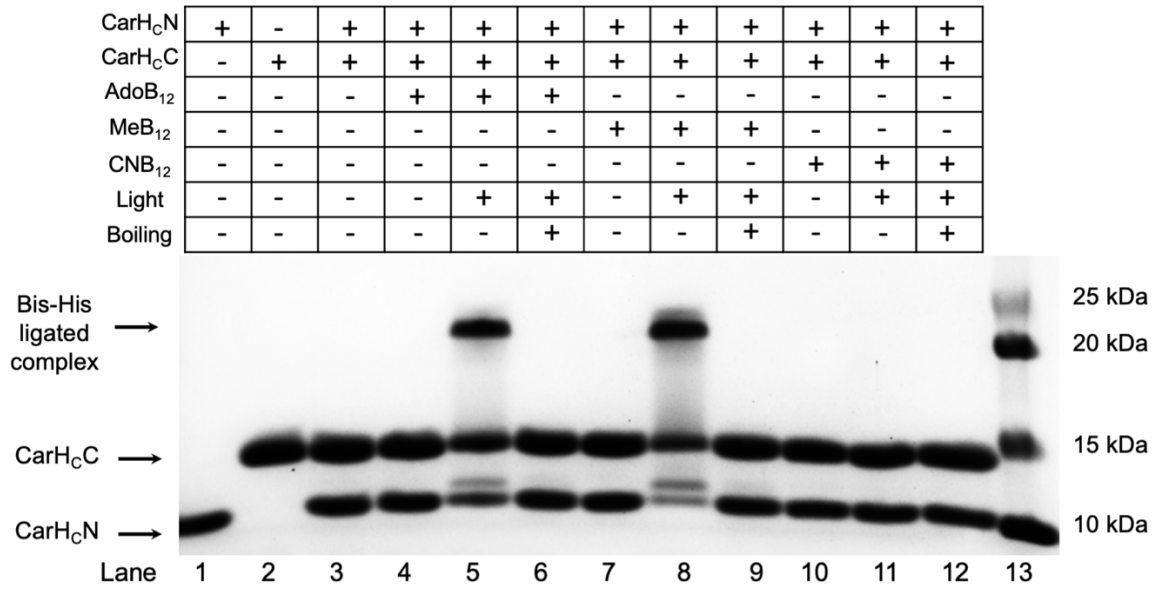

**Fig. S7. SDS-PAGE analysis of the split-CarH<sub>C</sub> reconstitution induced by AdoB<sub>12</sub>, MeB<sub>12</sub> and CNB<sub>12</sub>.** Protein samples were denatured with 2% SDS at room temperature or 100°C for 10 min before the electrophoresis.

**A**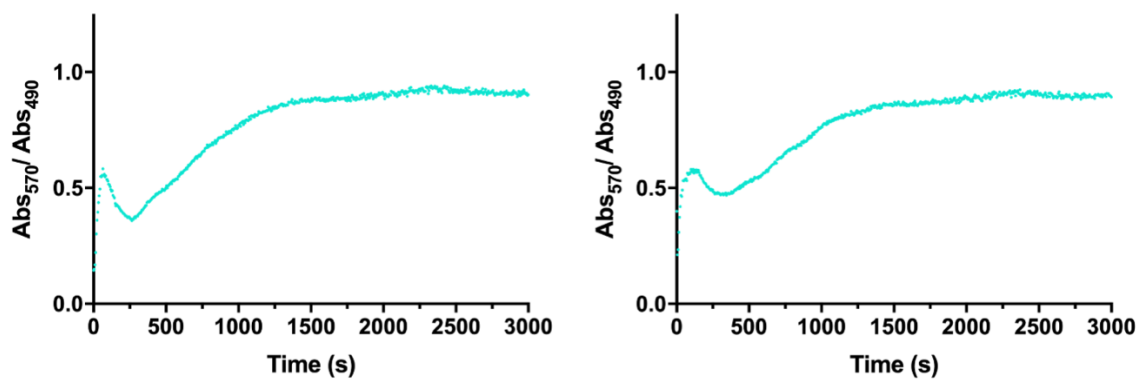**B**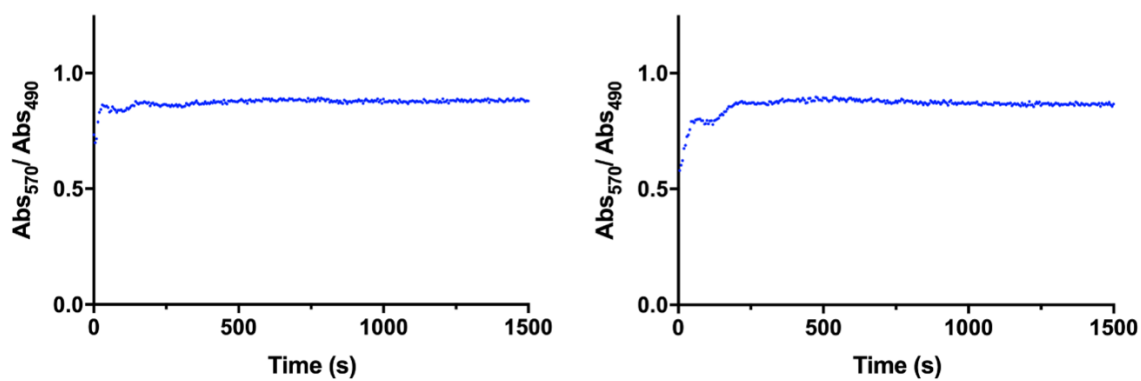

**Fig. S8. Representative curves showing the binding kinetics of AdoB<sub>12</sub> + split CarH<sub>C</sub> (A) and AdoB<sub>12</sub> + CarH<sub>C</sub> (B) from two independent measurements.** The concentrations of AdoB<sub>12</sub>, split CarH<sub>C</sub> and CarH<sub>C</sub> were all 50  $\mu$ M. Evolution of the ratio of the absorbance at 570 nm to that at 490 nm was recorded as a function of time.

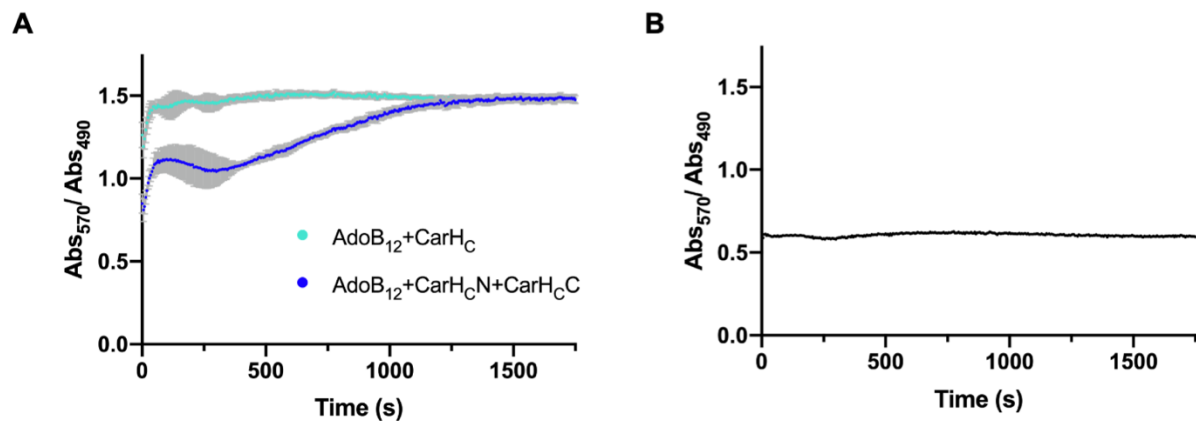

**Fig. S9. Binding kinetics.** (A) Binding kinetics of AdoB<sub>12</sub> (50 μM) to split CarH<sub>C</sub> or intact CarH<sub>C</sub> (50 μM). Evolution of the ratio of the absorbance at 570 nm to that at 490 nm was recorded as a function of time. Data are presented as mean ± SD (*n* = 5), with error bars in gray. (B) The corresponding  $Abs_{570}/Abs_{490}$  of free AdoB<sub>12</sub> solution with the passage of time.

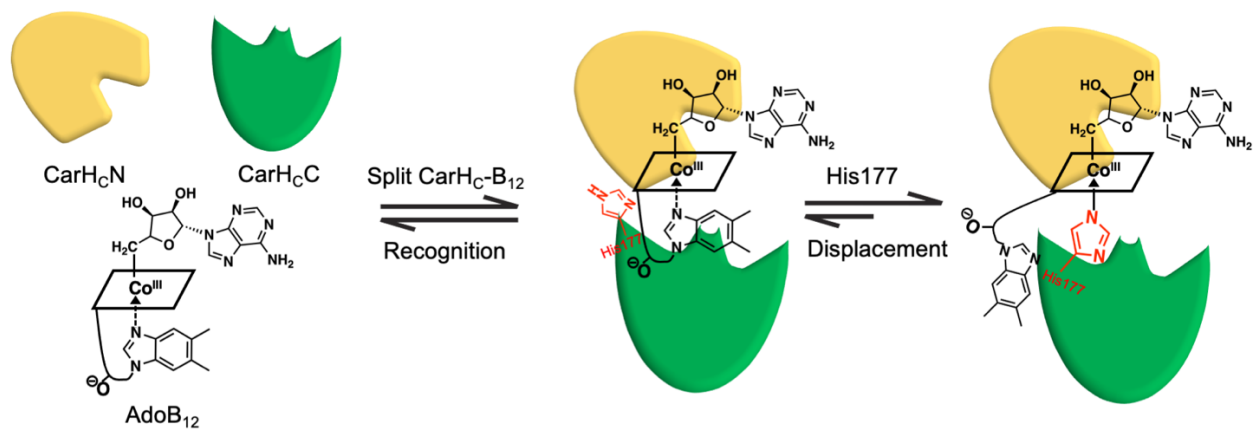

**Fig. S10. Schematic illustration of the proposed binding mechanism of split CarH<sub>C</sub> with AdoB<sub>12</sub>. The key residue His177 is highlighted in red.**

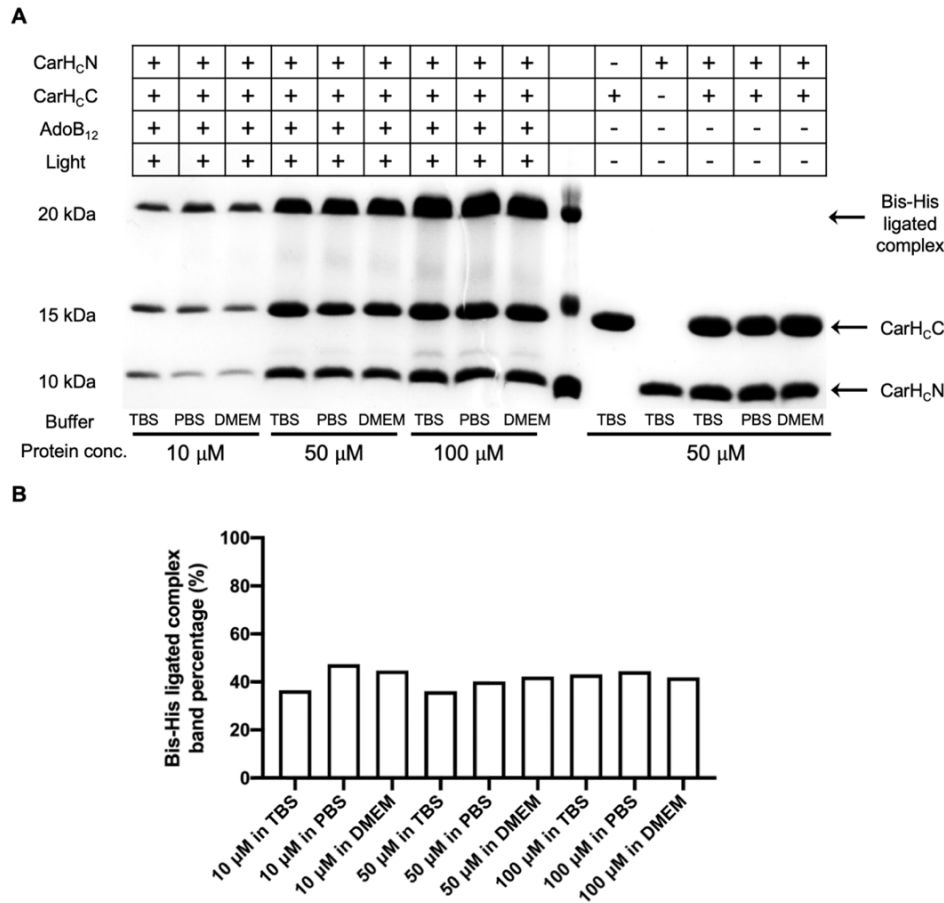

**Fig. S11. SDS-PAGE analysis of the assembly of CarH<sub>C</sub>N and CarH<sub>C</sub>C with AdoB<sub>12</sub> under various conditions.** The proteins, CarH<sub>C</sub>N and CarH<sub>C</sub>C, at an equimolar ratio were incubated with 2 *equiv.* AdoB<sub>12</sub> briefly in the dark for 20 min, followed by brief light exposure for 10 min, and then stopped by 4% SDS loading dye (2X) at room temperature. Shortened reaction time provided a snapshot for gauging the influence of different conditions on the assembly percentage. (A). According to the SDS-PAGE analysis below (B), the reactions, despite various buffer conditions and protein concentrations, all exhibited a similar yield (~40%) of the bis-His ligated product, which was quantified using the Image Lab software (Bio-Rad Laboratories). This result shows that this split CarH<sub>C</sub>-based GECC is robust under varied buffer conditions (TBS, PBS and DMEM) and protein concentrations (10 to 100  $\mu$ M).



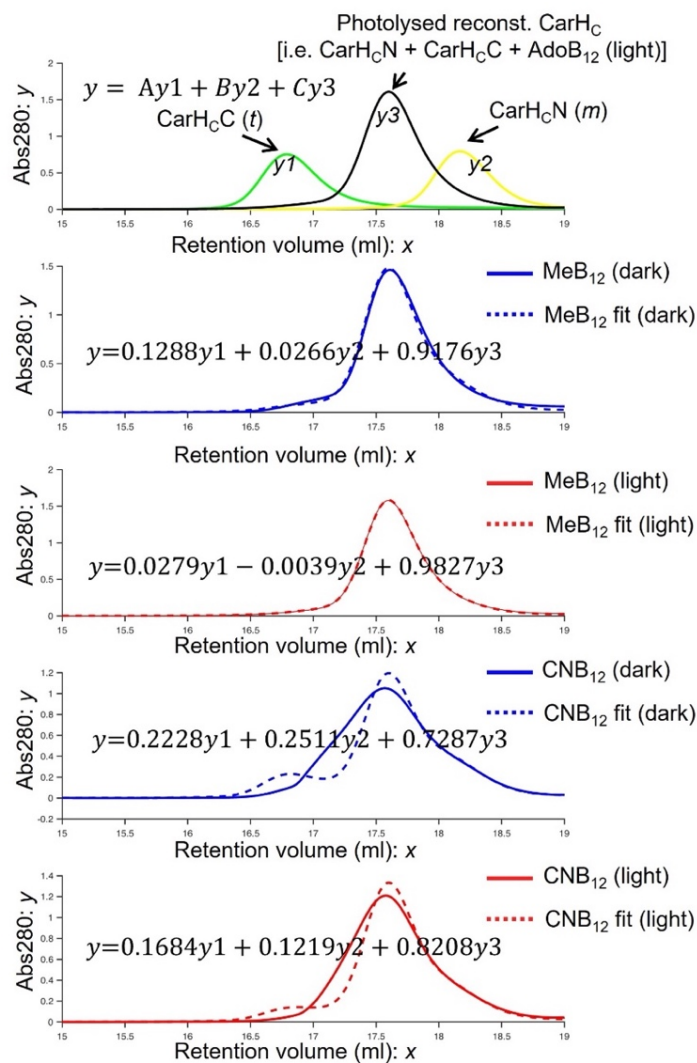

**Fig. S12. Reconstitution efficiency with different cofactors.** The results were deduced from the SEC data using MATLAB linear regression (the MATLAB code is provided as an appendix). Any observed SEC trace ( $y$ ), which is a function of retention time ( $x$ ), can be viewed as the linear combination of three types of protein molecules including CarH<sub>C</sub>N, CarH<sub>C</sub>C and reconstituted CarH<sub>C</sub> (i.e., CarH<sub>C</sub>N/CarH<sub>C</sub>C complex) and thus in principle can be deconvoluted into the corresponding three peaks,  $y_1$ ,  $y_2$  and  $y_3$ . In the equation  $y = Ay_1 + By_2 + Cy_3$ ,  $A$ ,  $B$  and  $C$  represent the relative percentages of these three molecules;  $C$  can therefore serve to measure reconstitution efficiency. To simplify this analysis, we used the AdoB<sub>12</sub>-induced reconstitution as a reference and assumed that its reconstitution efficiency was 100% (i.e.,  $C = 1$ ). Stated in these terms, the efficiency of MeB<sub>12</sub>-induced reconstitution is between ~92% (dark) and ~98% (light), respectively, while this number of CNB<sub>12</sub> stood between ~73% and ~82%, suggesting a relatively lower reconstitution efficiency with CNB<sub>12</sub>.

ACCA (33.4 kDa)

SpyTag-ELP-CarH<sub>c</sub>C-ELP-SpyTag

MKGSSHHHHHHVD AHIVMVDAYKPTKLDGHGVGVPGVGVPGVGVPGEGVPGVGV  
PGVGVPGVGVPGVGVPGEGVPGVGVPGVGVPGVGVPGVGVPGEGVPGVGVPGV  
GELGRGDGGGGSGGGGS PPGPPVLVTTTPGERHEIGAMLAAYHLRRKGVPALYLC  
PDTPLPDLRALARRLGAGAVLSAVLSEPLRALPDGALKDLAPRVFLGGQGAGPEEA  
RRLGAEYMEDLKGLAEALWLPRGPEKEATSVPGVGVPGVGVPGEGVPGVGVPGV  
GVPGVGVPGVGVPGEGVPGVGVPGVGVPGVGVPGVGVPGEGVPGVGVPGVGV  
GGLLD AHIVMVDAYKPTKLEWKK

BCNB (56.0 kDa)

SpyCatcher-ELP-CarH<sub>c</sub>N-ELP-SpyCatcher

MKGSSHHHHHHVDIPTTENLYFQ GAMVDTLSGLSSEQQSGDMTIEEDSATHIKFSK  
RDEDGKELAGATMELRDSSGKTISTWISDGQVKDFLYLPGKYTFVETAAPDGYEVAT  
AITFTVNEQQQVTVNGKATKGDAHIDGPQGIWGQLEGHGVGVPGVGVPGVGVPGE  
GVPGVGVPGVGVPGVGVPGVGVPGEGVPGVGVPGVGVPGVGVPGEGV  
GVGVPGVGVPGVGVPGVGVPGVGVPGVGVPGVGVPGVGVPGEGV  
GELGRGDGGGGSGGGGS PEDLGTGLLEALLRGDLAGAEALFRRGLRF  
WGPEGVLEHLLLPVREVGEAWHRGEIGVAEEHLASTFLRARLQELLDLAGFPPGPP  
TSVPGVGVPGVGVPGEGVPGVGVPGVGVPGVGVPGVGVPGEGVPGVGVPGVGV  
GVGVPGVGVPGEGVPGVGVPGVGVPGGLVDIPTTENLYFQ GAMVDTLSGLSSEQQ  
QSGDMTIEEDSATHIKFSKRDEDGKELAGATMELRDSSGKTISTWISDGQVKDFLYLP  
GKYTFVETAAPDGYEVATAITFTVNEQQQVTVNGKATKGDAHIDGPQGIWGQLEWKK

ACNA (29.8 kDa)

SpyTag-ELP-CarH<sub>c</sub>C-ELP-SpyTag

MKGSSHHHHHHVD AHIVMVDAYKPTKLDGHGVGVPGVGVPGVGVPGEGVPGVGV  
PGVGVPGVGVPGVGVPGEGVPGVGVPGVGVPGVGVPGVGVPGEGVPGVGVPGV  
GELGRGDGGGGSGGGGS PEDLGTGLLEALLRGDLAGAEALFRRGLRFWGPEGVLE  
HLLLPVREVGEAWHRGEIGVAEEHLASTFLRARLQELLDLAGFPPGPPTSVPVGV  
PGVGVPGEGVPGVGVPGVGVPGVGVPGVGVPGEGVPGVGVPGVGVPGVGV  
GVPGEVPGVGVPGVGVPGGLLD AHIVMVDAYKPTKLEWKK

BCCB (59.5 kDa)

SpyCatcher-ELP-CarH<sub>c</sub>C-ELP-SpyCatcher

MKGSSHHHHHHVDIPTTENLYFQ GAMVDTLSGLSSEQQSGDMTIEEDSATHIKFSK  
RDEDGKELAGATMELRDSSGKTISTWISDGQVKDFLYLPGKYTFVETAAPDGYEVAT  
AITFTVNEQQQVTVNGKATKGDAHIDGPQGIWGQLEGHGVGVPGVGVPGVGVPGE  
GVPGVGVPGVGVPGVGVPGVGVPGEGVPGVGVPGVGVPGVGVPGVGVPGEGV  
GVGVPGVGVPGVGVPGVGVPGVGVPGVGVPGVGVPGVGVPGVGVPGVGVPGVGV  
GELGRGDGGGGSGGGGS PPGPPVLVTTTPGERHEIGAMLAAYHLRRK  
GVPALYLGPDTPLPDLRALARRLGAGAVLSAVLSEPLRALPDGALKDLAPRVFLGG  
QGAGPEEARRLGAEYMEDLKGLAEALWLPRGPEKEATSVPGVGVPGVGVPGEGV  
PGVGVPGVGVPGVGVPGVGVPGEGVPGVGVPGVGVPGVGVPGVGVPGEGVPGV  
GVPGVGVPGGLVDIPTTENLYFQ GAMVDTLSGLSSEQQSGDMTIEEDSATHIKFSK  
RDEDGKELAGATMELRDSSGKTISTWISDGQVKDFLYLPGKYTFVETAAPDGYEVAT  
AITFTVNEQQQVTVNGKATKGDAHIDGPQGIWGQLEWKK

**Fig. S13. Amino acid sequences of SpyTag-ELP-CarH<sub>c</sub>C-ELP-SpyTag (ACCA), SpyCatcher-ELP-CarH<sub>c</sub>N-ELP-SpyCatcher (BCNB), SpyTag-ELP-CarH<sub>c</sub>N-ELP-SpyTag (ACNA) and SpyCatcher-ELP-CarH<sub>c</sub>C-ELP-SpyCatcher (BCCB). Sequences of SpyTag, SpyCatcher, CarH<sub>c</sub>N and CarH<sub>c</sub>C are highlighted in red, purple, yellow, and green, respectively. Sequences of RGD cell binding motifs and MMP sites are underlined and boxed, respectively.**

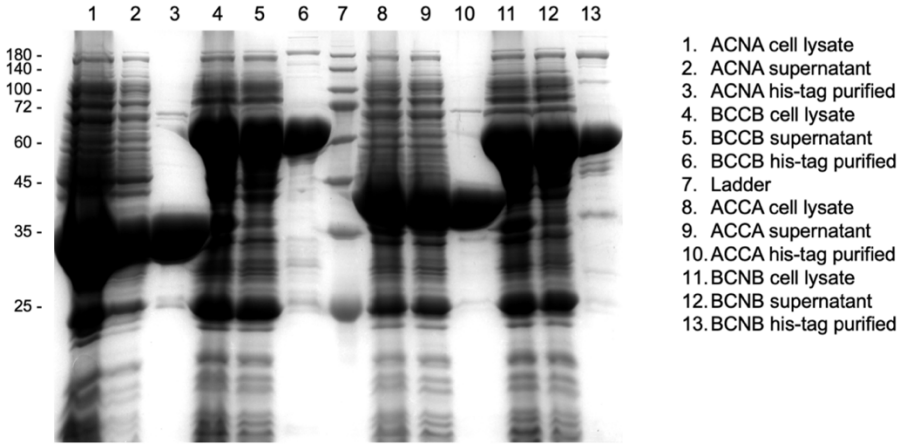

**Fig. S14. SDS-PAGE analysis of ACNA (29.8 kDa), BCCB (59.5 kDa), ACCA (33.4 kDa) and BCNB (56.0 kDa).**

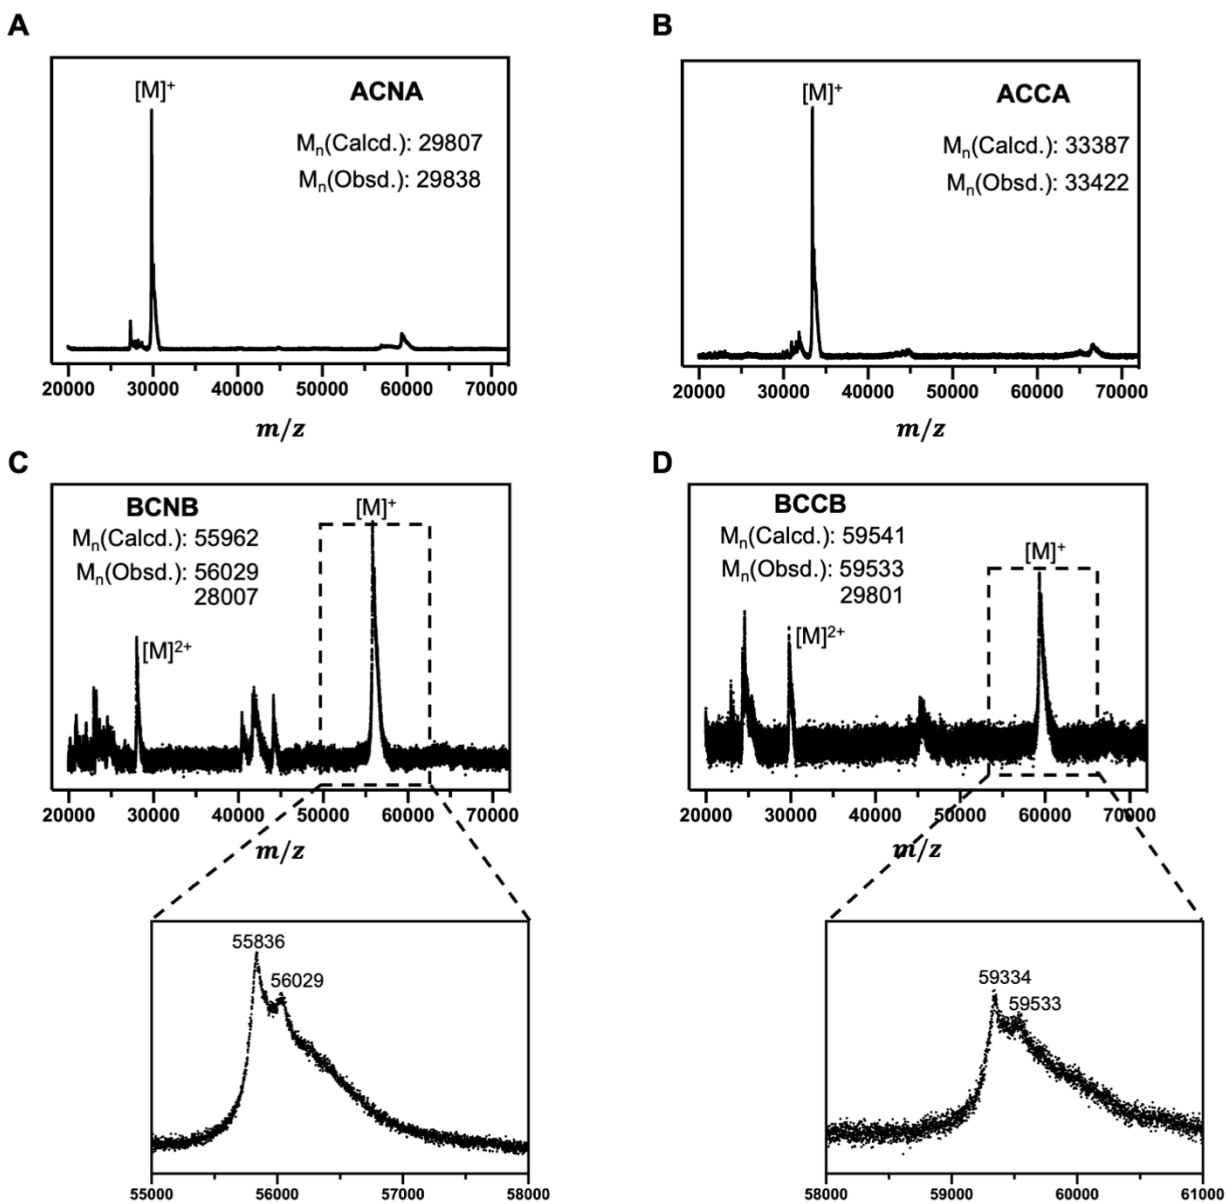

Fig. S15. MALDI-TOF mass spectra of (A) ACNA, (B) ACCA, (C) BCNB and (D) BCCB.

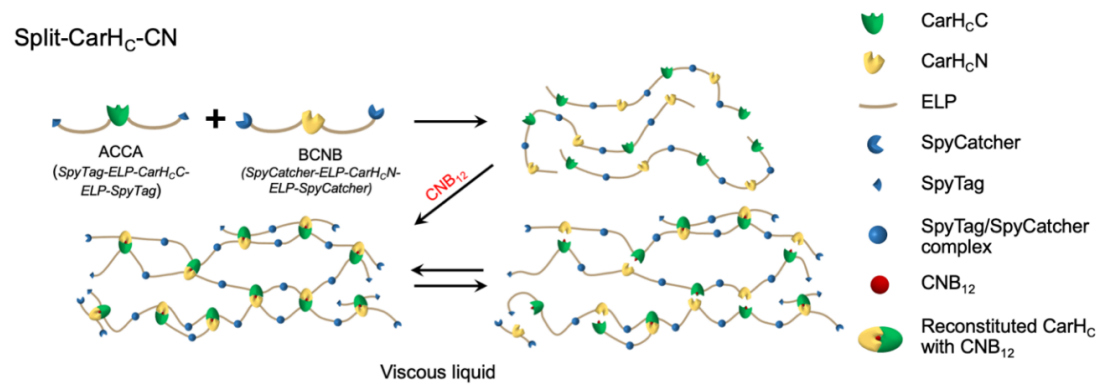

**Fig. S16. Schematic showing the formation of a physical network comprising ACCA + BCNB + CNB<sub>12</sub>.**

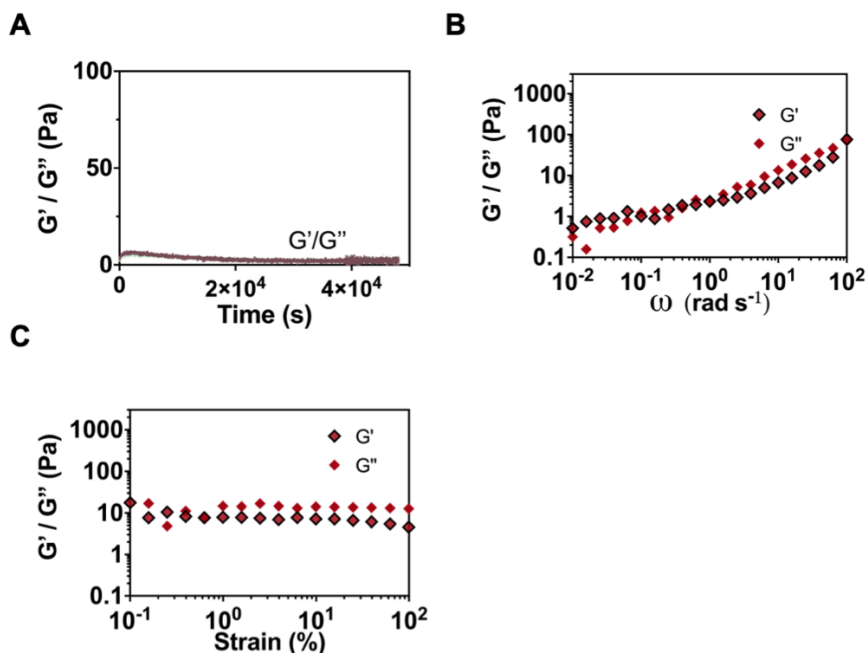

**Fig. S17. Rheological characterization showing that the product of ACCA+ BCNB at an equimolar ratio in the absence of B<sub>12</sub> is a liquid.** (A) Evolution of the storage modulus  $G'$  and loss modulus  $G''$  of ACCA + BCNB free of B<sub>12</sub> at 23 °C as a function of time with a fixed frequency of 1 rad/s and strain of 5% at 23 °C. (B) Frequency-sweep test at 23 °C with the strain fixed at 5%. (C) Strain-sweep test at 23 °C with the frequency fixed at 1 rad/s.

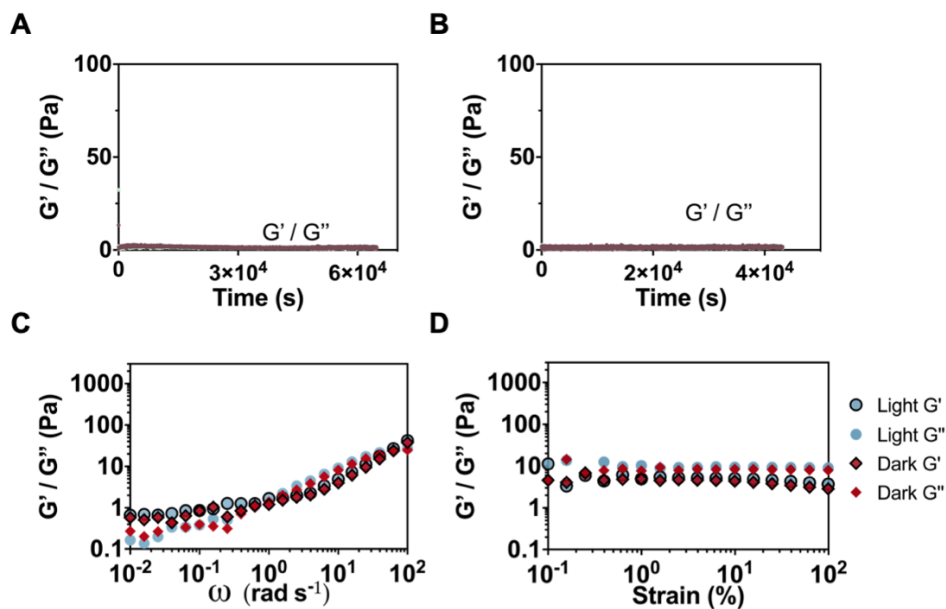

**Fig. S18. Rheological characterization showing that the product of ACCA+BCNB+CNB<sub>12</sub> remains as a liquid before and after light exposure.** (A and B) Evolution of the storage modulus  $G'$  and loss modulus  $G''$  of ACCA+BCNB+CNB<sub>12</sub> at 23 °C in the dark (A) and under light illumination (B) as a function of time. The time-sweep tests were performed at a fixed frequency of 1 rad/s and strain of 5% at 23 °C. (C) Frequency-sweep tests at a fixed strain of 10% at 23 °C. (D) Strain-sweep tests at a fixed frequency of 10 rad/s at 23 °C.

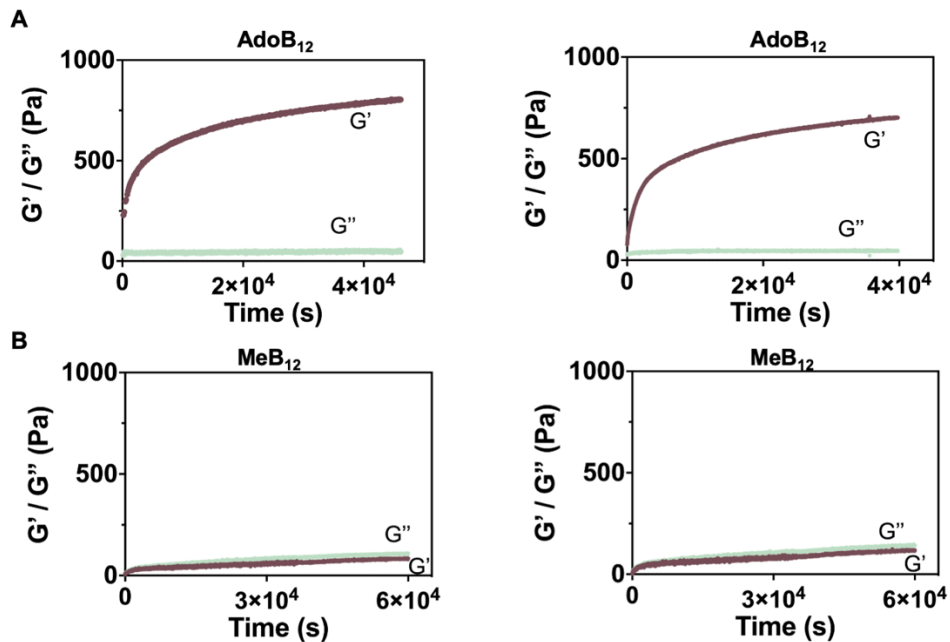

**Fig. S19.** Two additional replicates of time-sweep tests of products of (A) ACCA + BCNB + AdoB<sub>12</sub> and (B) ACCA + BCNB + MeB<sub>12</sub> in the dark. Experiments were performed at a fixed frequency of 1 rad/s and strain of 5% at 23 °C.



**A**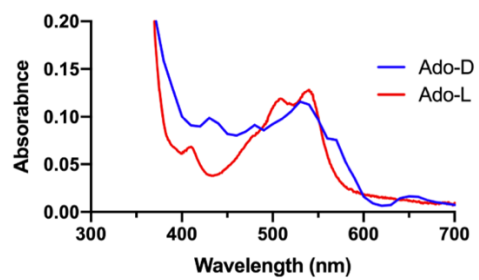**B**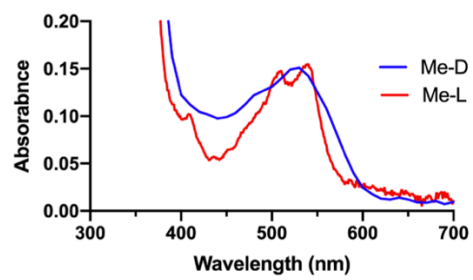

**Fig. S20.** UV-vis spectra of Ado-D, Ado-L (A), Me-D and Me-L (B) hydrogels.

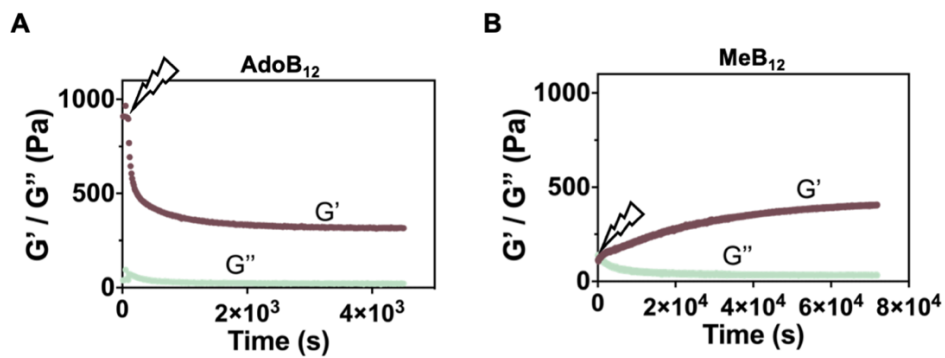

Fig. S21. Photo-weakening of Ado gel (A) and photo-strengthening of Me gel (B) monitored by time-sweep tests at a fixed frequency of 1 rad/s and strain of 5% at 23 °C.

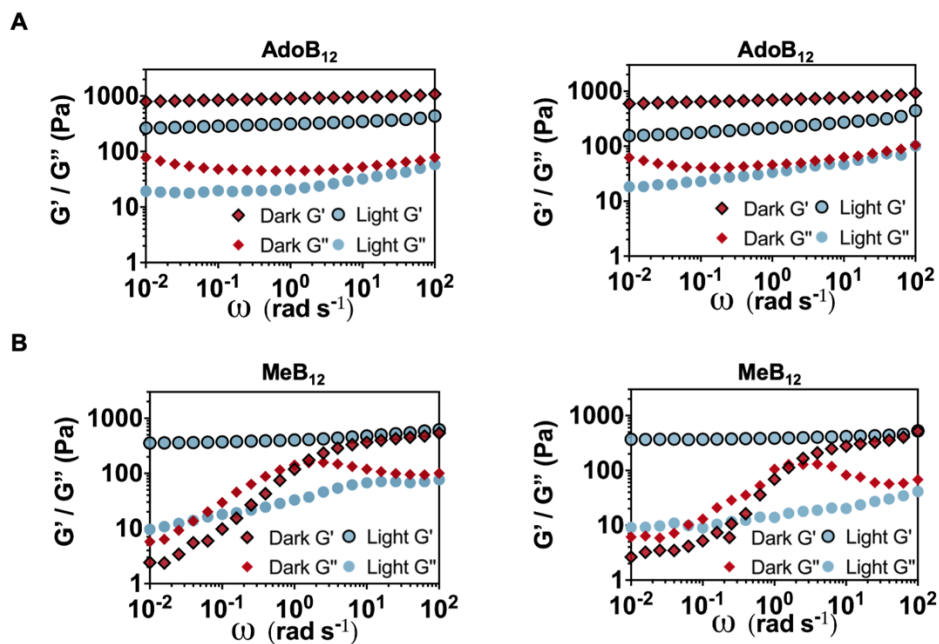

**Fig. S22.** Two additional replicates of frequency-sweep tests of the products of (A) ACCA + BCNB + AdoB<sub>12</sub> and (B) ACCA + BCNB + MeB<sub>12</sub> before and after photolysis. Experiments were performed at a fixed strain of 10% at 23 °C.

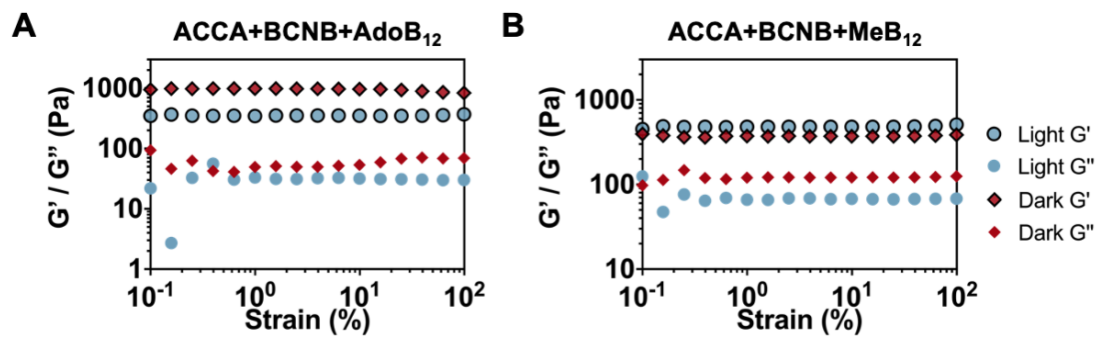

**Fig. S23.** Strain-sweep tests of the products of ACCA + BCNB + AdoB<sub>12</sub> (A) and ACCA + BCNB + MeB<sub>12</sub> (B) before and after photolysis. Experiments were performed at a fixed frequency of 10 rad/s at 23 °C.

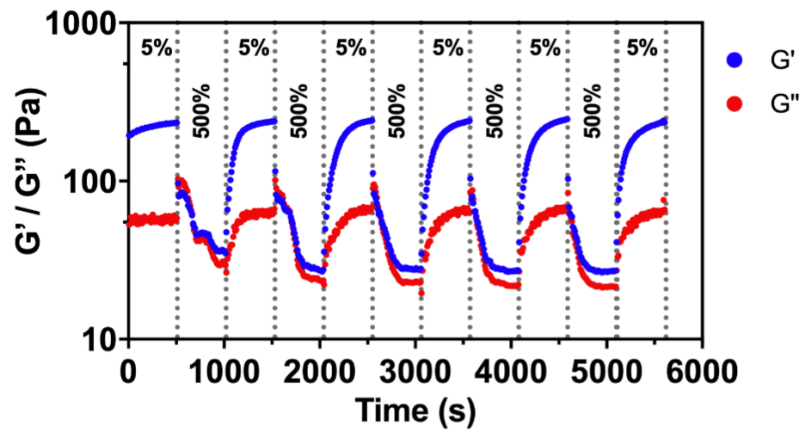

**Fig. S24. Continuous step-strain test of Me-D.** Low (5%) and high strains (500%) were used alternately. Experiments were performed at a fixed frequency of 10 rad/s at 23 °C.

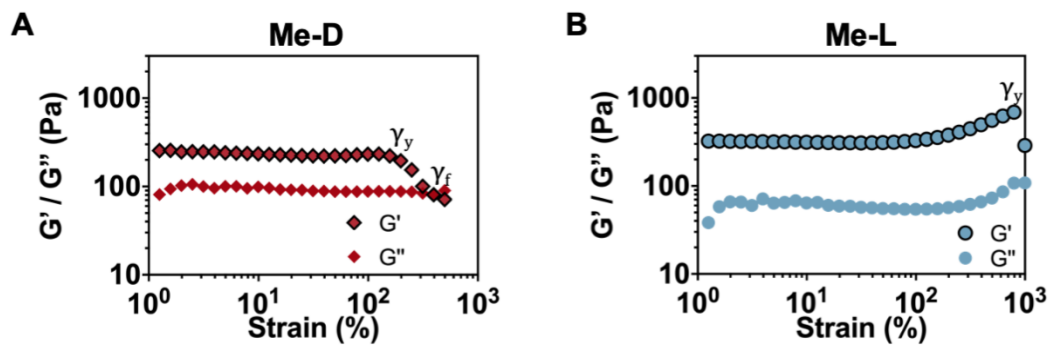

**Fig. S25. Large amplitude strain-sweep tests of the products of ACCA + BCNB + MeB<sub>12</sub> before (A) and after (B) photolysis.** The results show that photo-strengthening of the gels increases their strain linearity limit. Experiments were performed at a fixed frequency of 10 rad/s at 23 °C.

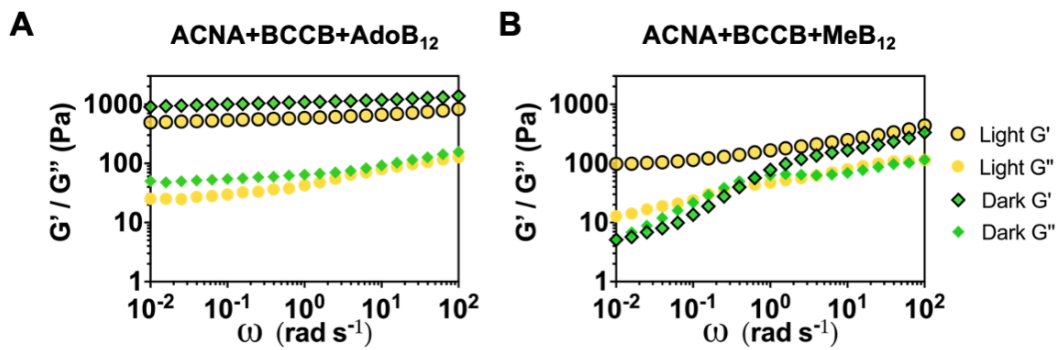

**Fig. S26.** Frequency-sweep tests of the products of ACNA + BCCB + AdoB<sub>12</sub> (A) and ACNA + BCCB + MeB<sub>12</sub> (B) before and after photolysis. Experiments were performed at a fixed strain of 10% at 23 °C.

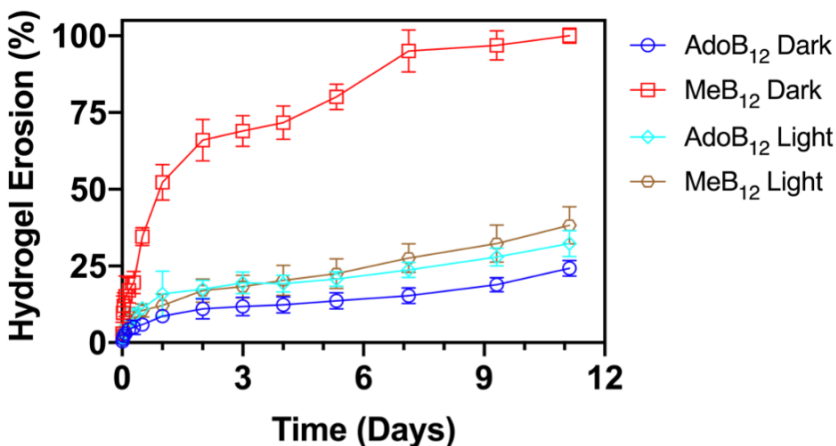

**Fig. S27. Erosion profiles of Ado and Me gels.** Data are presented as mean  $\pm$  SD ( $n = 5$ ). Hydrogels were prepared by mixing 16.6  $\mu\text{L}$  of ACCA (10 wt % in PBS), 27.8  $\mu\text{L}$  of BCNB (10 wt % in PBS) and 5.4  $\mu\text{L}$  of AdoB<sub>12</sub> or MeB<sub>12</sub> (10 mM in PBS). The products were cured in the dark for 24 h. Half of the resulting materials were further exposed to 30 kilolux light for another 24 h. Then all samples were immersed by 1 mL of PBS (pH 7.4). Aliquots of 75  $\mu\text{L}$  were taken at defined time points and fresh PBS (75  $\mu\text{L}$ ) was added back to keep the volume constant. All the experiments were performed at 23  $^{\circ}\text{C}$ . The absorbances of these aliquots at 280 and 522 nm were measured using a NANODROP 2000C spectrophotometer (Thermo Scientific). Protein concentrations were calculated based on the previous published equations (24):

$$A_{280}(\text{protein}) = A_{280} - A_{522} * \frac{A_{280}(\text{AdoB}_{12}, 100\mu\text{M})}{A_{522}(\text{AdoB}_{12}, 100\mu\text{M})}$$

$$C(\text{protein}) = \frac{A_{280}(\text{protein})}{\text{Ext. coeff}}$$



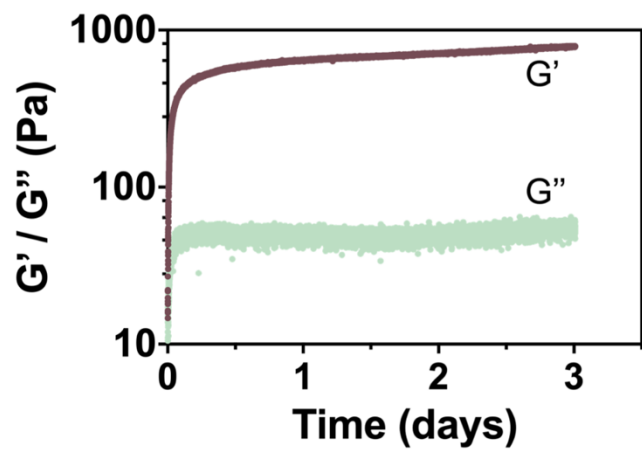

**Fig. S28. Time-sweep test of ACCA + BCNB + AdoB<sub>12</sub> in the dark.** Experiments was performed at a fixed frequency of 1 rad/s and strain of 5% at 23 °C.

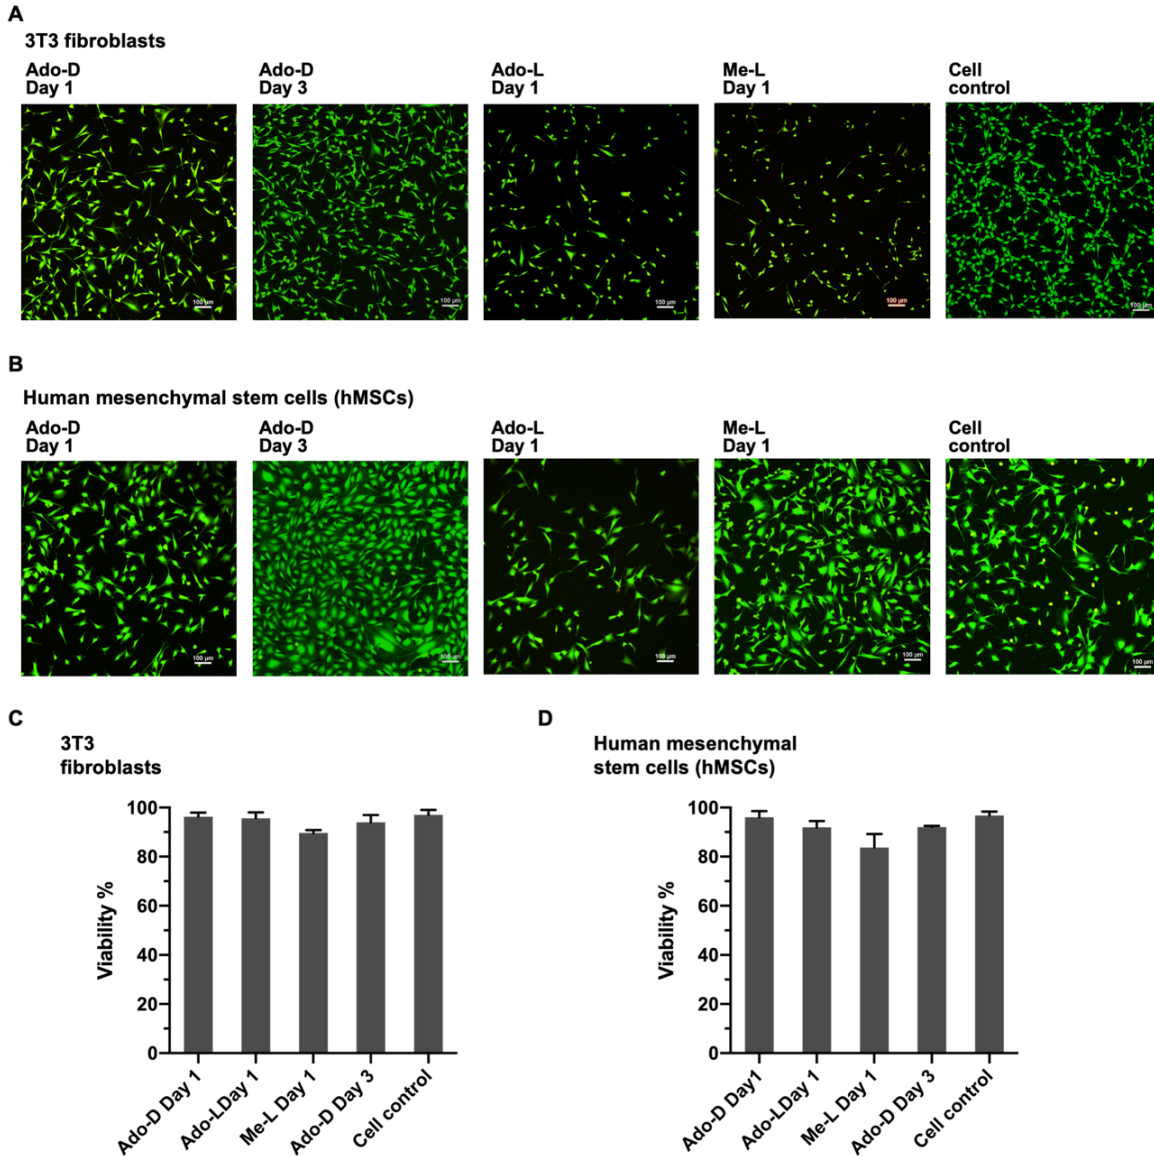

**Fig. S29. Influence of gel precursors on cell viability.** (A and B) Representative images of 3T3 fibroblasts (A) and human mesenchymal stem cells (hMSCs) (B) cultured in growth medium (1 mL) spiked with gel precursors including ACCA (1.7 mg or 50 nmol), BCNB (2.8 mg or 50 nmol), and AdoB<sub>12</sub> or MeB<sub>12</sub> (56 nmol). The dry weights of these gel precursors in 1 mL of growth medium were the same as in the cell encapsulation experiments. Three independent experiments were performed. Cell cultures free of gel precursors were used as control groups. (C and D) Cell viability was calculated as the ratio of live cell population to entire cell population and presented as mean  $\pm$  SD ( $n = 3$ ).

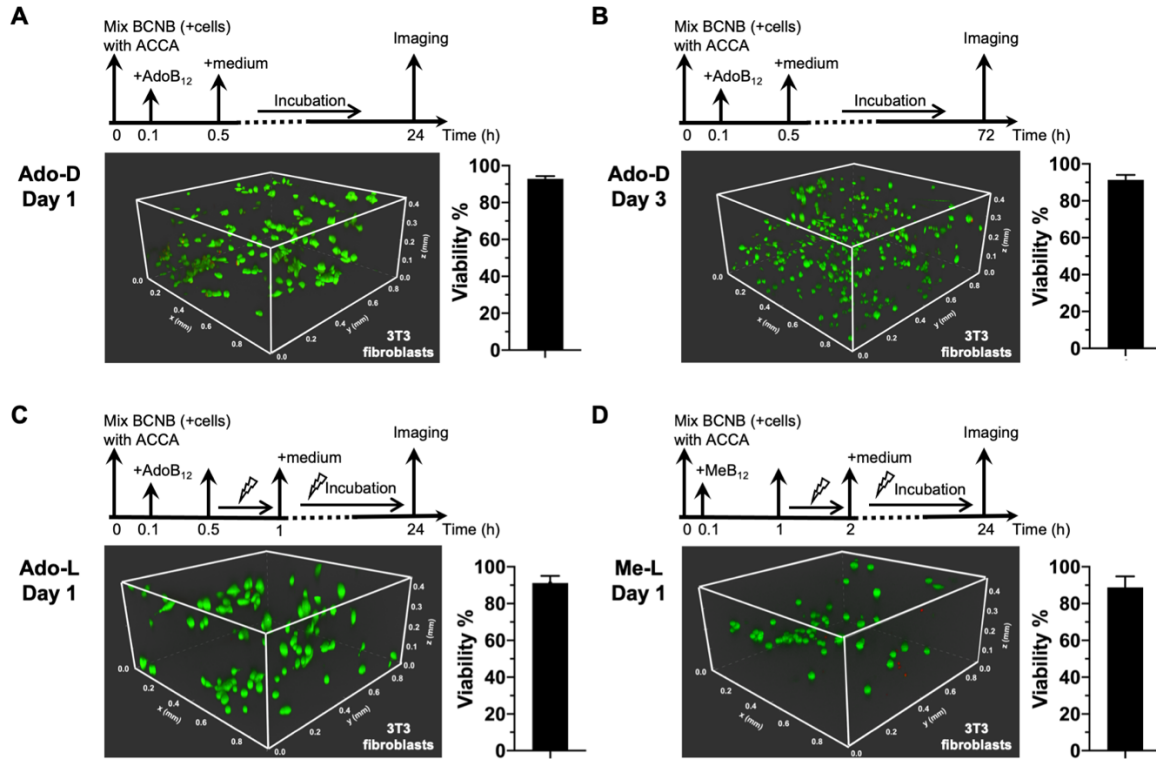

**Fig. S30. Encapsulation of mouse 3T3 fibroblasts.** (A) One-day culturing with an Ado gel in the dark. (B) Three-day culturing with an Ado gel in the dark. (C) One-day culturing with a photo-weakened Ado gel. (D) One-day culturing with a photo-strengthened Me gel. Cell viability was assessed by the standard live (green) /dead (red) staining assay. Three independent cell encapsulation experiments were performed, each time done in triplicate (with three identical gels prepared for each corresponding encapsulation condition). Cell viability under each condition was calculated as the ratio of live cell population to entire cell population based on the three parallel experiments and presented as mean  $\pm$  SD ( $n = 3$ ).

**3T3 fibroblasts**

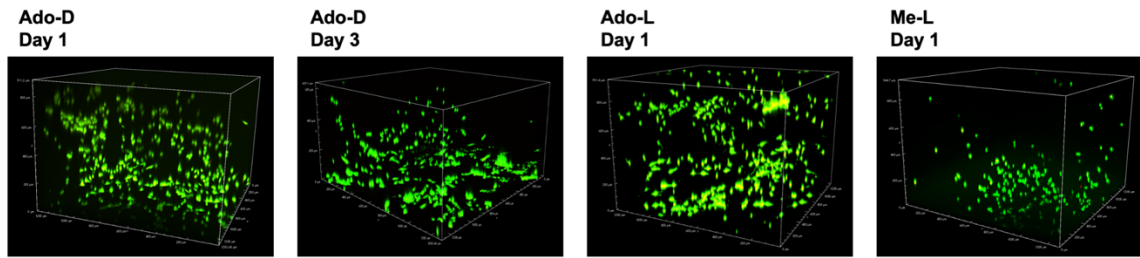

**Human mesenchymal stem cells (hMSCs)**

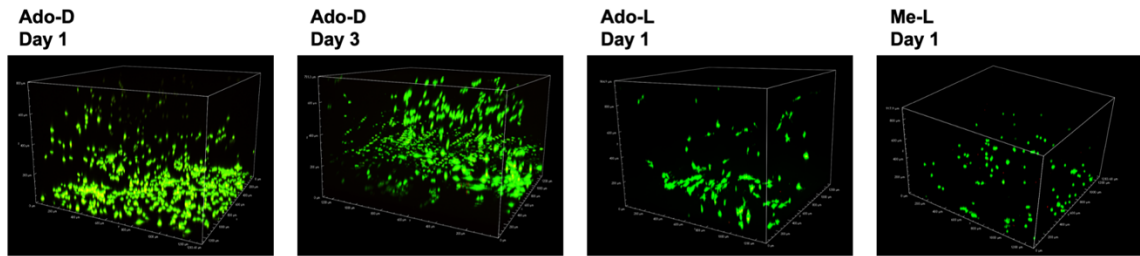

**Fig. S31. Images of 3D encapsulation of 3T3 fibroblasts and hMSCs obtained from two additional independent experiments. Cell viability was assessed by the standard live (green) /dead (red) staining assay.**

**Table S1. Bacterial strains, plasmids, and primers used in this study.**

| <b>Strain</b>                       | <b>Relevant Characteristics</b>                                                      | <b>Source</b>                       |
|-------------------------------------|--------------------------------------------------------------------------------------|-------------------------------------|
| <i>E.coli</i> DH5 $\alpha$          |                                                                                      | Stratagene                          |
| <i>E.coli</i> BL21 star(DE3)        |                                                                                      | Invitrogen                          |
| <b>Plasmid</b>                      | <b>Relevant Characteristics</b>                                                      | <b>Source</b>                       |
| pET32m3C                            | T7 promoter-operator, His tag, Trx solubilization tag, HRV 3C site, Amp <sup>r</sup> | Prof. Mingjie Zhang (46)            |
| pET32m3C- <i>carH<sub>c</sub>N</i>  | Plasmid for expression of CarH <sub>c</sub> N                                        | This study                          |
| pET32m3C- <i>carH<sub>c</sub>C</i>  | Plasmid for expression of CarH <sub>c</sub> C                                        | This study                          |
| pQE-AAA                             | Plasmid for expression of SpyTag-ELP-SpyTag-ELP-SpyTag                               | Previously published construct (25) |
| pQE-ACNA                            | Plasmid for expression of SpyTag-ELP-CarH <sub>c</sub> N-ELP-SpyTag                  | This study                          |
| pQE-ACCA                            | Plasmid for expression of SpyTag-ELP-CarH <sub>c</sub> C-ELP-SpyTag                  | This study                          |
| pQE-BB                              | Plasmid for expression of SpyCatcher-ELP-RGD-ELP-SpyCatcher                          | Previously published construct (25) |
| pQE-BCNB                            | Plasmid for expression of SpyCatcher-CarH <sub>c</sub> N-RGD-ELP-SpyCatcher          | This study                          |
| pQE-BCCB                            | Plasmid for expression of SpyCatcher-CarH <sub>c</sub> C-RGD-ELP-SpyCatcher          | This study                          |
| <b>Primer</b>                       | <b>Relevant Characteristics</b>                                                      | <b>Source</b>                       |
| <i>carH<sub>c</sub>N</i> _EcoRI_F   | CCGGAATTCCCAGAAGATCTGGGCACCGG                                                        | Genewiz                             |
| <i>carH<sub>c</sub>N</i> _HindIII_R | CCCAAGCTTTTACGGCGGACCCGGCGGGA<br>AAC                                                 | Genewiz                             |
| <i>carH<sub>c</sub>C</i> _EcoRI_F   | CCGGAATTCCCGCCGGGTCCGCCGGTCCT                                                        | Genewiz                             |
| <i>carH<sub>c</sub>C</i> _HindIII_R | CCCAAGCTTTTAGATTGCTTCTTTTTCCGG<br>AC                                                 | Genewiz                             |
| <i>carH<sub>c</sub>N</i> _SacI_F    | GGTGAGCTCGGCCGTGGTGATGGTGGTGG<br>GGGTAGCGGTGGTGGGGGTAGTCCAGAAG<br>ATCTGGGCACCGG      | Genewiz                             |
| <i>carH<sub>c</sub>N</i> _SpeI_R    | CGGACTAGTCGGCGGACCCGGCGGGAAC                                                         | Genewiz                             |
| <i>carH<sub>c</sub>C</i> _SacI_F    | GGTGAGCTCGGCCGTGGTGATGGTGGTGG<br>GGGTAGCGGTGGTGGGGGTAGTCCGCCGG<br>GTCCGCCGGTCCT      | Genewiz                             |
| <i>carH<sub>c</sub>C</i> _SpeI_R    | CGGACTAGTGATTGCTTCTTTTTCCGGAC                                                        | Genewiz                             |

## Appendix:

### ###MATLAB code (size-exclusion chromatography data fitting)

```
load FeiData2.mat

% C: CarHcC(t) g
% N: CarHcN(t) y
% NC: k
% MeDark: b
% MeLight: r

filter = x>15 & x<=22;
x=x(filter);
C=C(filter);
N=N(filter);
NC=NC(filter);
MeDark=MeDark(filter);
MeLight=MeLight(filter);
CNDark=CNDark(filter);
CNLight=CNLight(filter);

figure;
subplot(5,1,1)
plot(x,C,'g','linewidth',4)
hold on
plot(x,N,'y','linewidth',4)
plot(x,NC,'k','linewidth',4)
set(gca,'tickdir','out','linewidth',2,'fontsize',16)
legend({'CarH_CN','CarH_CC','CarH_CN+CarH_CC'})

subplot(5,1,2)
plot(x,MeDark,'b','linewidth',4)
hold on

b1=[N C NC]\MeDark;

plot(x,b1(1)*N+b1(2)*C+b1(3)*NC,'b--','linewidth',4)
set(gca,'tickdir','out','linewidth',2,'fontsize',16)
legend({'MeDark','MeDark-Fit'})

subplot(5,1,3)
plot(x,MeLight,'r','linewidth',4)
hold on

b2=[N C NC]\MeLight;

plot(x,b2(1)*N+b2(2)*C+b2(3)*NC,'r--','linewidth',4)
set(gca,'tickdir','out','linewidth',2,'fontsize',16)
legend({'MeLight','MeLight-Fit'})

subplot(5,1,4)
plot(x,CNDark,'b','linewidth',4)
hold on

b3=[N C NC]\CNDark;
```

```
plot(x,b3(1)*N+b3(2)*C+b3(3)*NC,'b--','linewidth',4)
set(gca,'tickdir','out','linewidth',2,'fontsize',16)
legend({'CNDark','CNDark-Fit'})
```

```
subplot(5,1,5)
plot(x,CNLight,'r','linewidth',4)
hold on
```

```
b4=[N C NC]\CNLight;
```

```
plot(x,b4(1)*N+b4(2)*C+b4(3)*NC,'r--','linewidth',4)
set(gca,'tickdir','out','linewidth',2,'fontsize',16)
legend({'CNLight','CNLight-Fit'})
```
